# Supplementary material
Source: ML conference proceedings conference paper supplement (https://openaccess.thecvf.com/content/CVPR_2019/html/Nie_Multi-Level_Context_Ultra-Aggregation_CVPR_2019_paper.html)
Supplement: Supplementary file 1 [file Nie_Multi-Level_Context_Ultra-Aggregation_CVPR_2019_supplemental.pdf]

# Supplementary Material of Multi-Level Context Ultra-Aggregation for Stereo Matching

Guang-Yu Nie<sup>1</sup> Ming-Ming Cheng<sup>2</sup> Yun Liu<sup>2</sup> Zhengfa Liang<sup>3</sup>

Deng-Ping Fan<sup>2</sup> Yue Liu<sup>1,4</sup> \* Yongtian Wang<sup>1,4</sup>

<sup>1</sup> Beijing Institute of Technology      <sup>2</sup> TKLNDST, CS, Nankai University

<sup>3</sup> National Key Laboratory of Science and Technology on Blind Signal Processing

<sup>4</sup> AICFVE, Beijing Film Academy

<http://mmcheng.net/mcua/>

## 1. Residual Module

Tab. 1 shows the layer-wise definition of the residual module.

---

\*Yue Liu (liuyue@bit.edu.cn) is the corresponding author.

Table 1. The Details of Residual Module

| Type        | K | S | P | Output                  | Dim.    | I/O | Input                                                       |
|-------------|---|---|---|-------------------------|---------|-----|-------------------------------------------------------------|
| Left Image  |   |   |   |                         |         |     |                                                             |
| Deconv.     | 3 | 2 | 0 | left_fea_up_2x          | 32/32   | 4/2 | <b>fusion</b>                                               |
| Crop        | – | – | – | left_fea_up_2x_cropped  | 32/32   | 2/2 | left_fea_up_2x                                              |
| Conv.       | 3 | 1 | 1 | left_fea_2x             | 64/32   | 2/2 | Concat[ <b>conv1_x</b> , left_fea_up_2x_cropped]            |
|             | 3 | 1 | 1 |                         | 32/32   |     |                                                             |
| Deconv.     | 3 | 2 | 0 | left_fea_up_1x          | 32/32   | 2/1 | left_fea_2x                                                 |
| Crop        | – | – | – | left_fea_up_1x_cropped  | 32/32   | 1/1 | left_fea_up_1x                                              |
| Conv.       | 3 | 1 | 1 | left_fea_1x             | 64/32   | 1/1 | left_fea_up_1x_cropped                                      |
|             | 3 | 1 | 1 |                         | 32/32   |     |                                                             |
| Right Image |   |   |   |                         |         |     |                                                             |
| Deconv.     | 3 | 2 | 0 | right_fea_up_2x         | 32/32   | 4/2 | <b>fusion</b>                                               |
| Crop        | – | – | – | right_fea_up_2x_cropped | 32/32   | 2/2 | right_fea_up_2x                                             |
| Conv.       | 3 | 1 | 1 | right_fea_2x            | 64/32   | 2/2 | Concat[ <b>conv1_x</b> , right_fea_up_2x]                   |
|             | 3 | 1 | 1 |                         | 32/32   |     |                                                             |
| Deconv.     | 3 | 2 | 0 | right_fea_up_1x         | 32/32   | 2/1 | right_fea_2x                                                |
| Crop        | – | – | – | right_fea_up_1x_cropped | 32/32   | 1/1 | right_fea_up_1x                                             |
| Conv.       | 3 | 1 | 1 | right_fea_1x            | 64/32   | 1/1 | right_fea_up_1x                                             |
|             | 3 | 1 | 1 |                         | 32/32   |     |                                                             |
| Residual    |   |   |   |                         |         |     |                                                             |
| Warp        | – | – | – | left_warped             | 32/32   | 1/1 | <b>Map1</b> , right_fea_1x                                  |
| Error       | – | – | – | left_error              | 32/32   | 1/1 | left_fea_1x - left_warped                                   |
| Conv.       | 5 | 1 | 2 | R_conv1_1               | 65/128  | 1/1 | Concat[left_error, left_fea_1x, <b>Map1</b> , <b>Left</b> ] |
| Conv.       | 5 | 1 | 2 | R_conv1_2               | 128/256 | 1/1 | R_conv1_1                                                   |
| Conv.       | 5 | 1 | 2 | R_residual              | 256/1   | 1/1 | R_conv1_2                                                   |
| Disparity   |   |   |   |                         |         |     |                                                             |
| Sum.        | – | – | – | <b>R_Dispatch</b>       | 1/1     | 1/1 | <b>Map1</b> + R_residual                                    |

**K, S, P**: kernel size, stride, and padding of convolutional layer; **Dim.**: dimension of input/output feature maps; **I/O**: scale of input/output feature maps; **conv1\_x, fusion**: feature maps generated by  $F_3$  and  $F_8$ ; Symbol “+/-”: element-wise summation/subtraction operation.
